# Supplementary material
Source: PubMed Central journal article supplement (PMC6447408)

A. Frontal Cortex

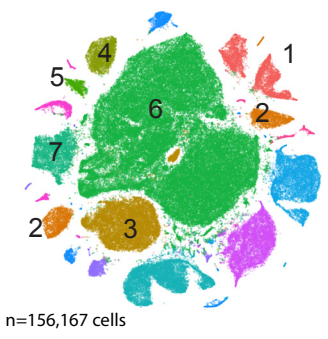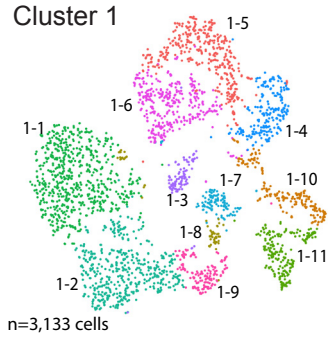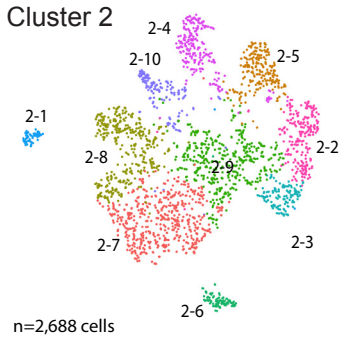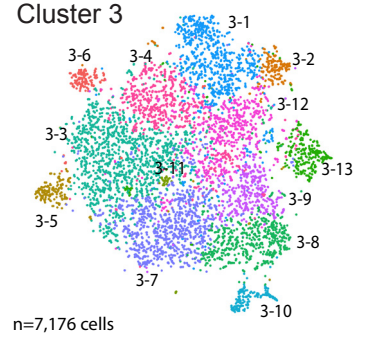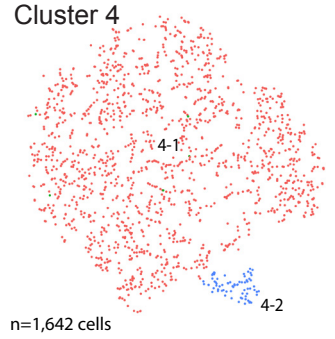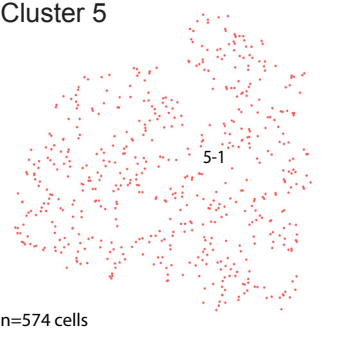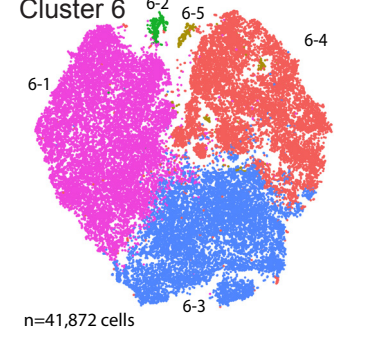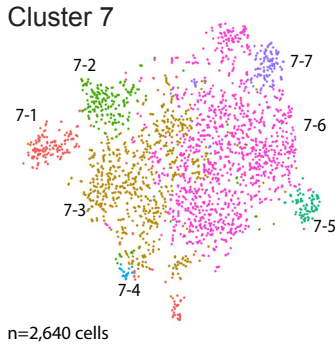

# Data S3

## B. Posterior Cortex

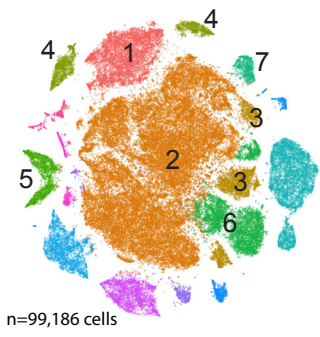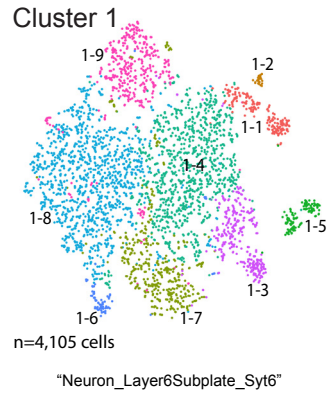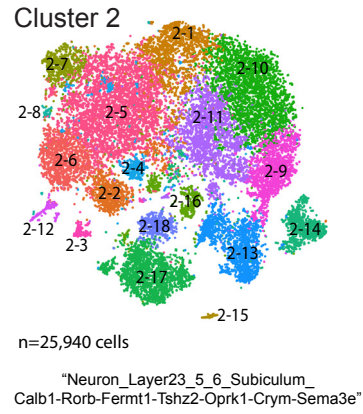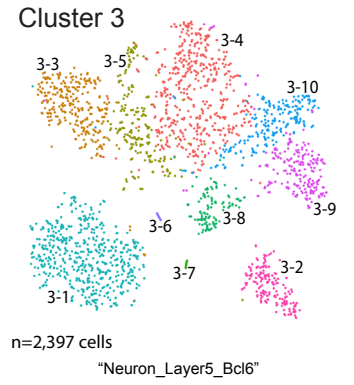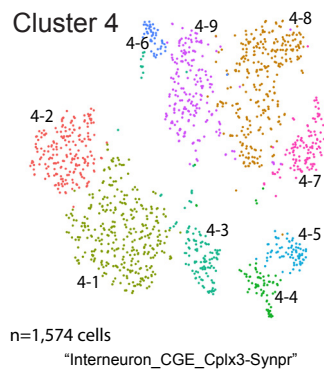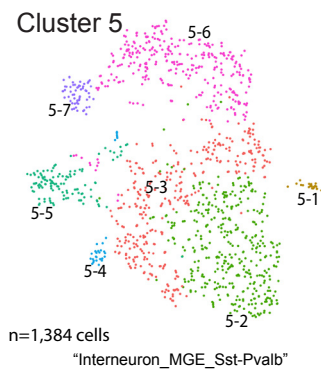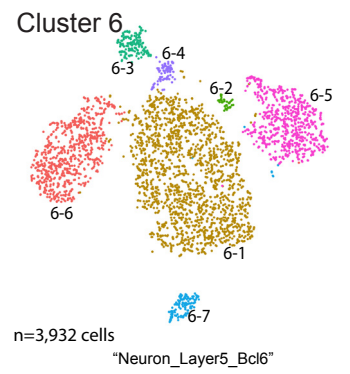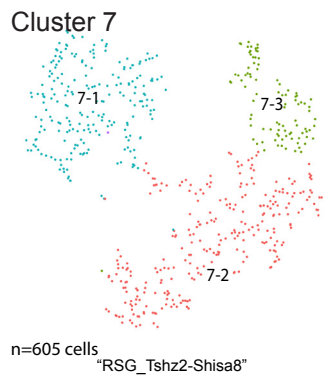

# Data S3

## C. Hippocampus

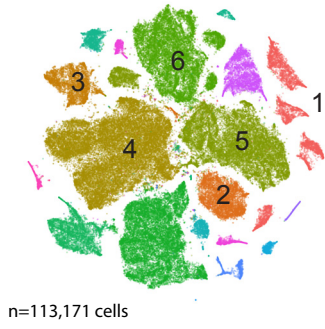

Cluster 1

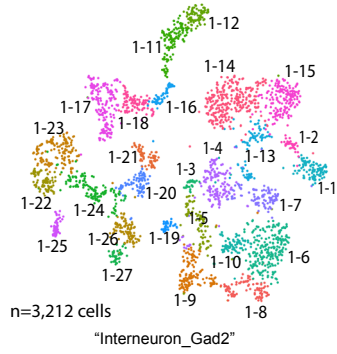

Cluster 2

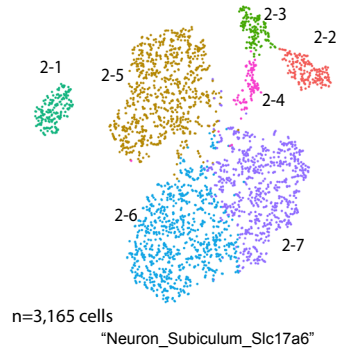

Cluster 3

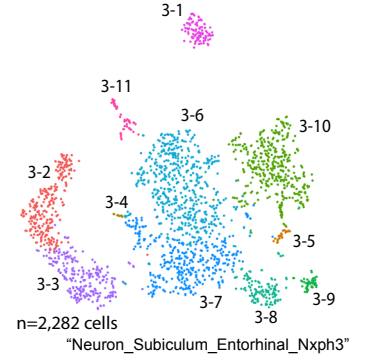

Cluster 4

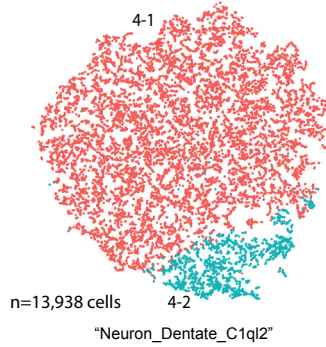

Cluster 5

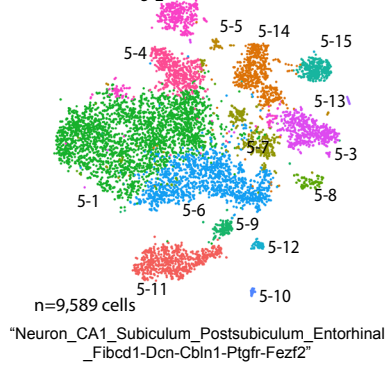

Cluster 6

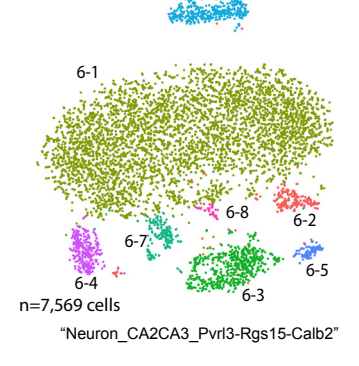

Cluster 14

[No tSNE]  
n=336 cells  
Neuron\_CajalRetzius\_Lhx1

## D. Thalamus

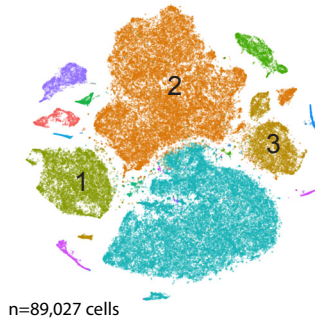

Cluster 1

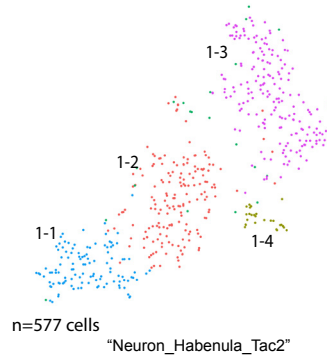

Cluster 2

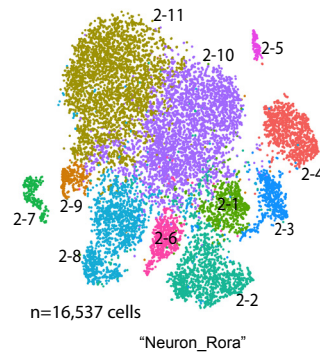

Cluster 3

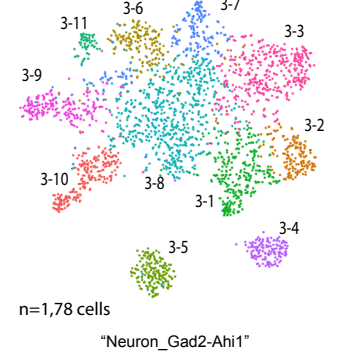

# Data S3

## E. Striatum

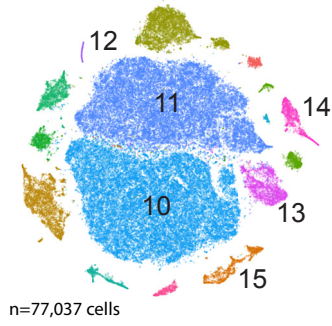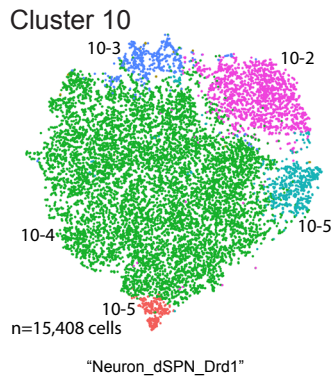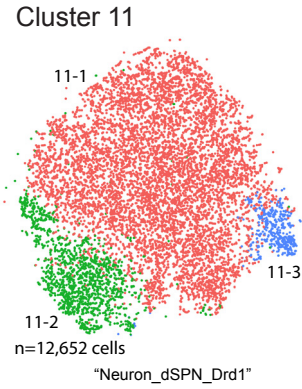

### Cluster 12

[No tSNE]  
n=160 cells  
"Interneuron\_Chat"

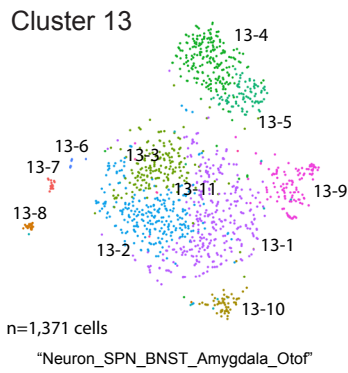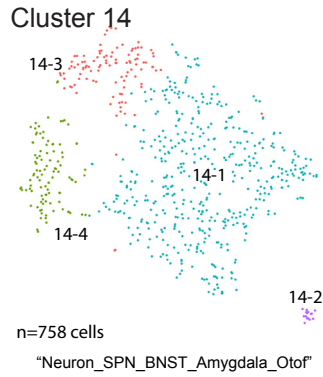

### Cluster 15

[No tSNE]  
n=276 cells  
"Interneuron\_Sst"

## F. Globus Pallidus Externus/Nucleus Basalis

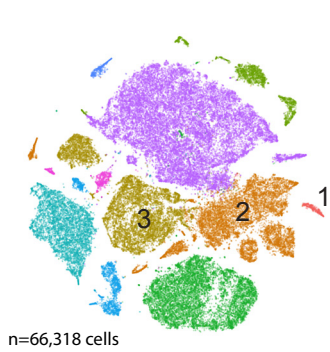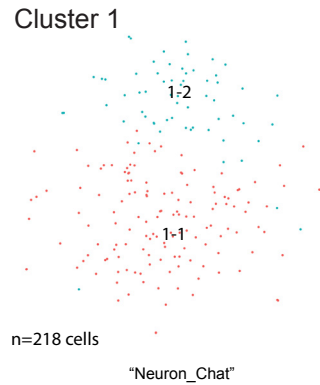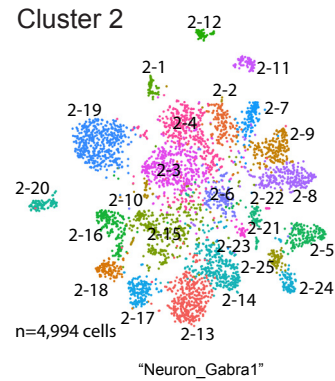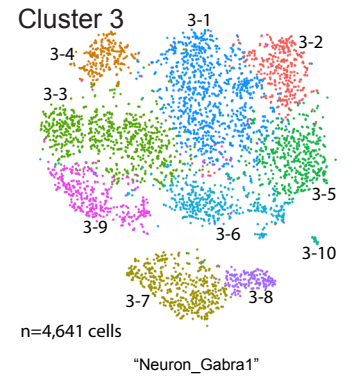

# Data S3

## G. Entopeduncular Nucleus/Subthalamic nucleus

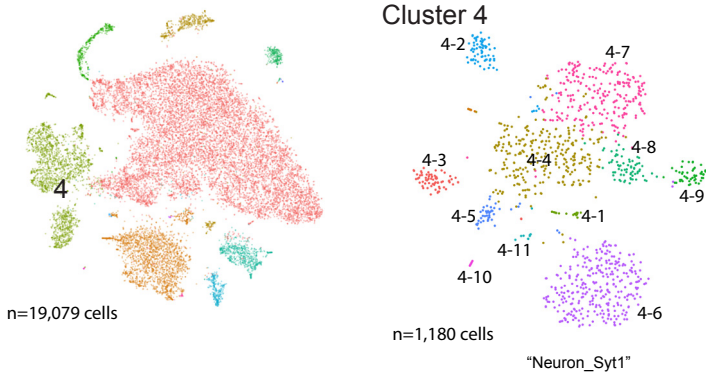

## H. Substantia Nigra/Ventral Tegmental Area

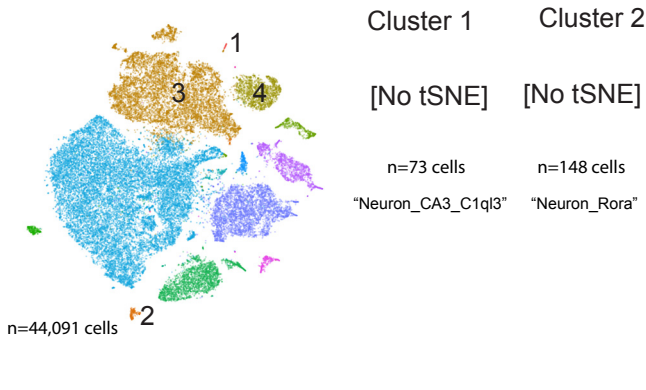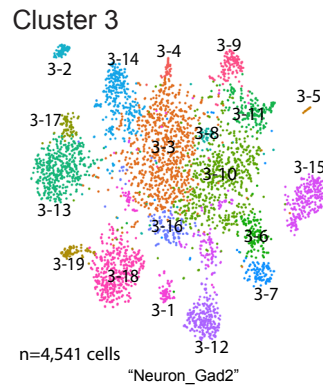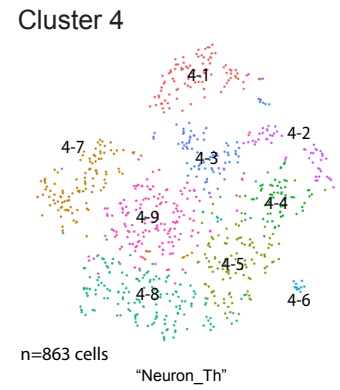

## I. Cerebellum

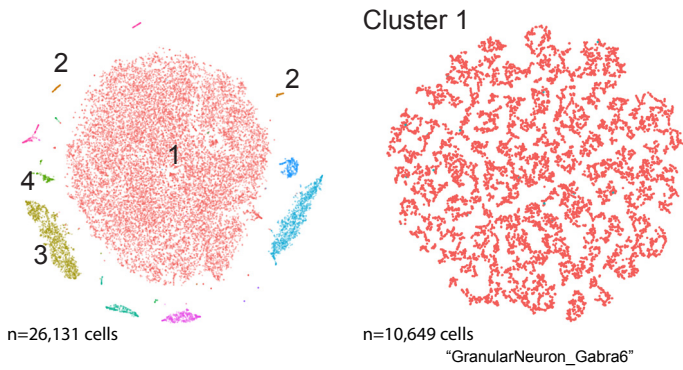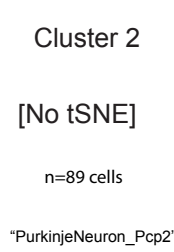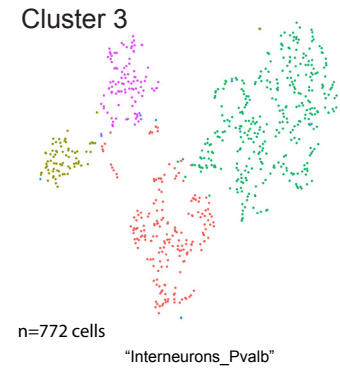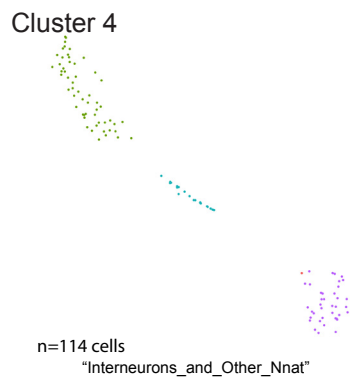

Supplement: NIHMS1503321-supplement-Data_S3.pdf [file NIHMS1503321-supplement-Data_S3.pdf]
