# Supplementary material
Source: PubMed Central journal article supplement (PMC6447408)

Astrocytes

A

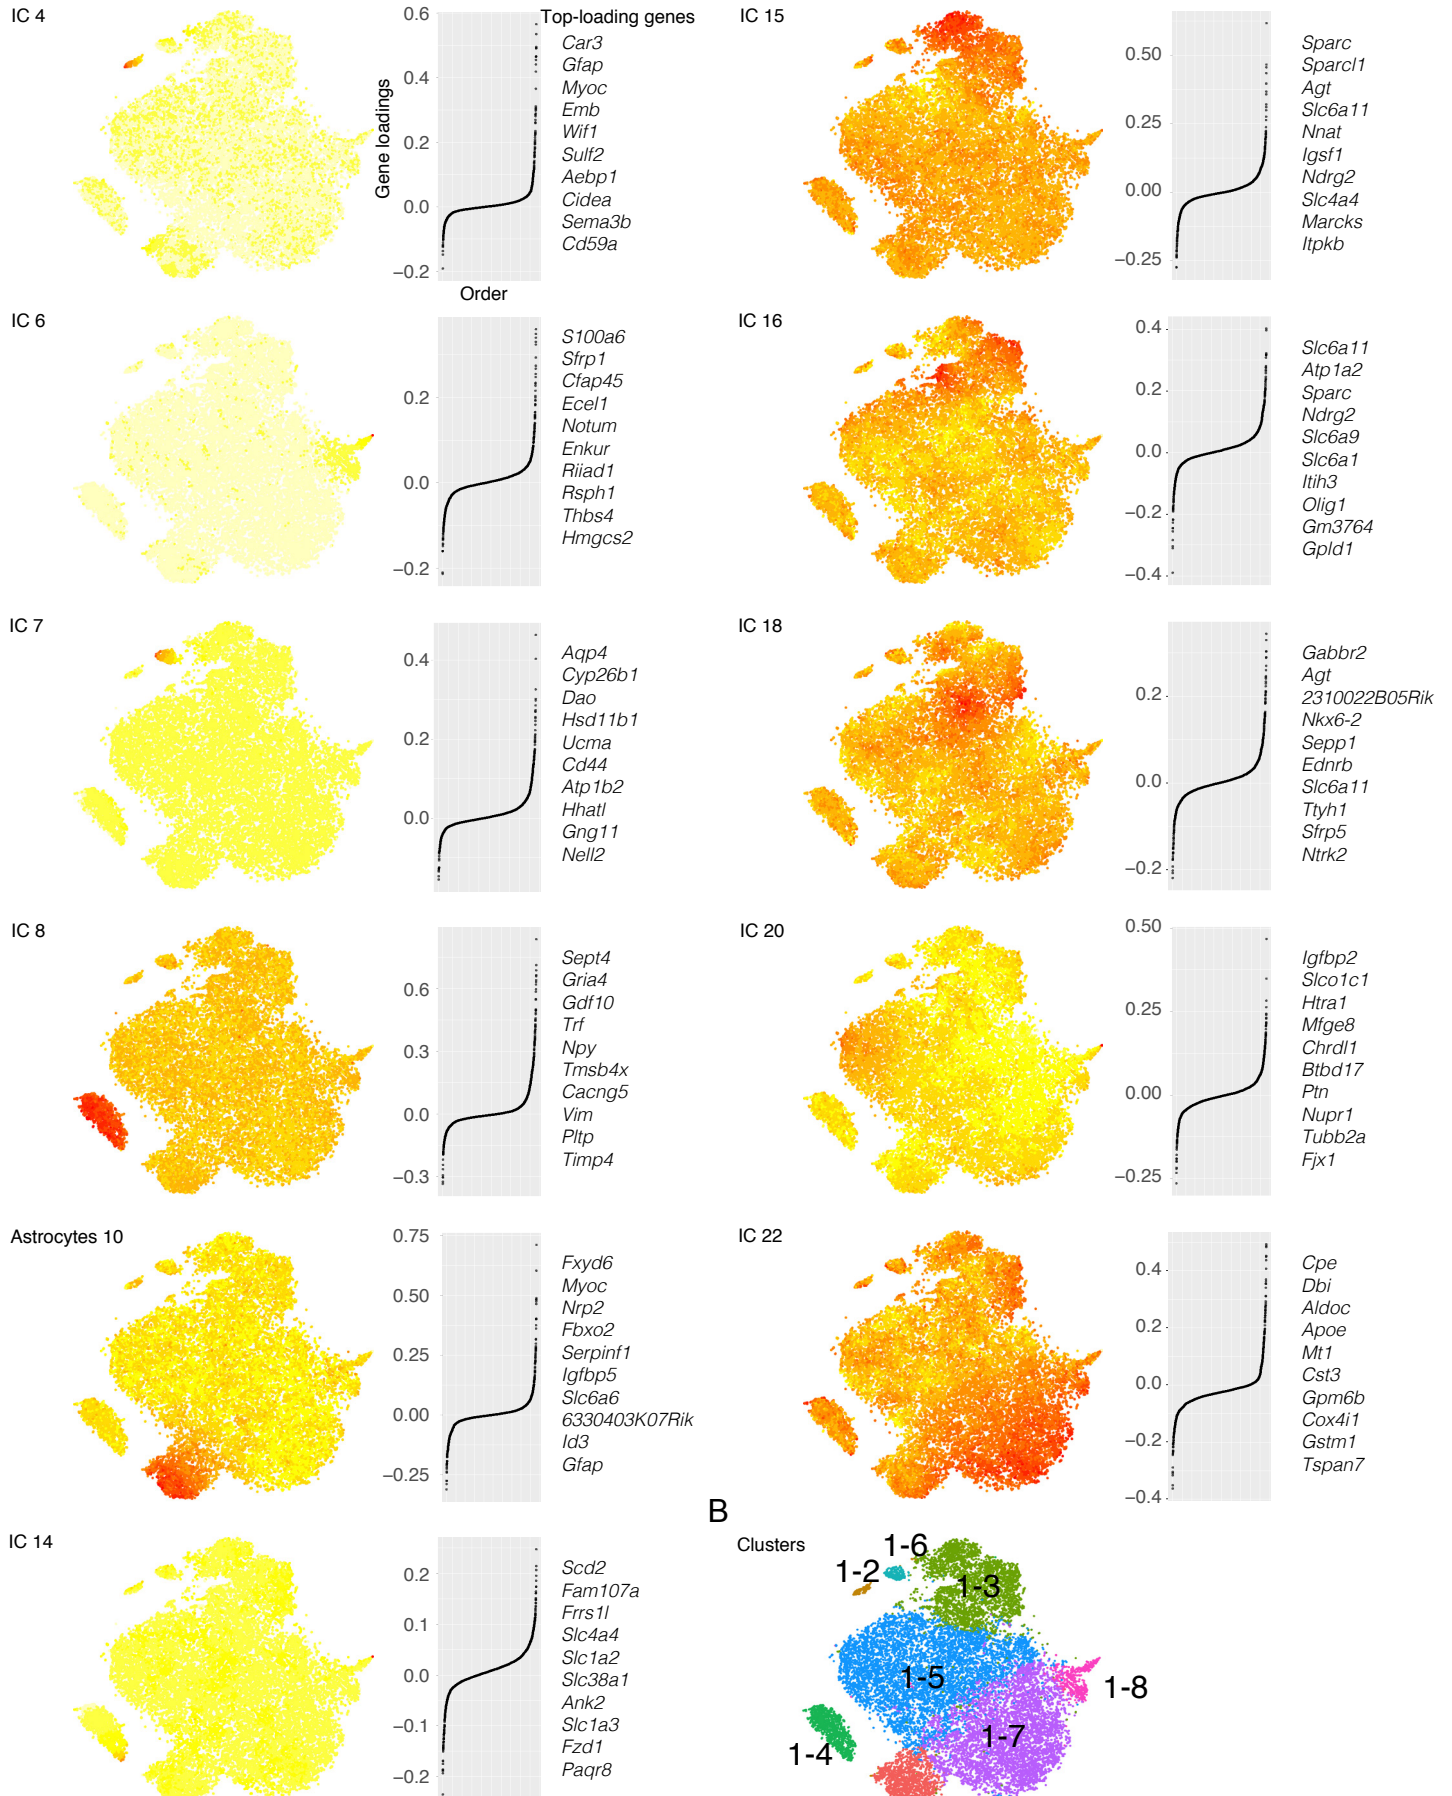

B

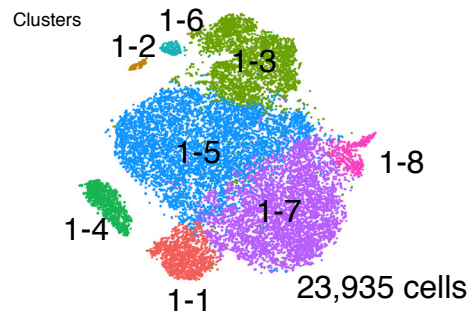

# Microglia & Macrophage

A

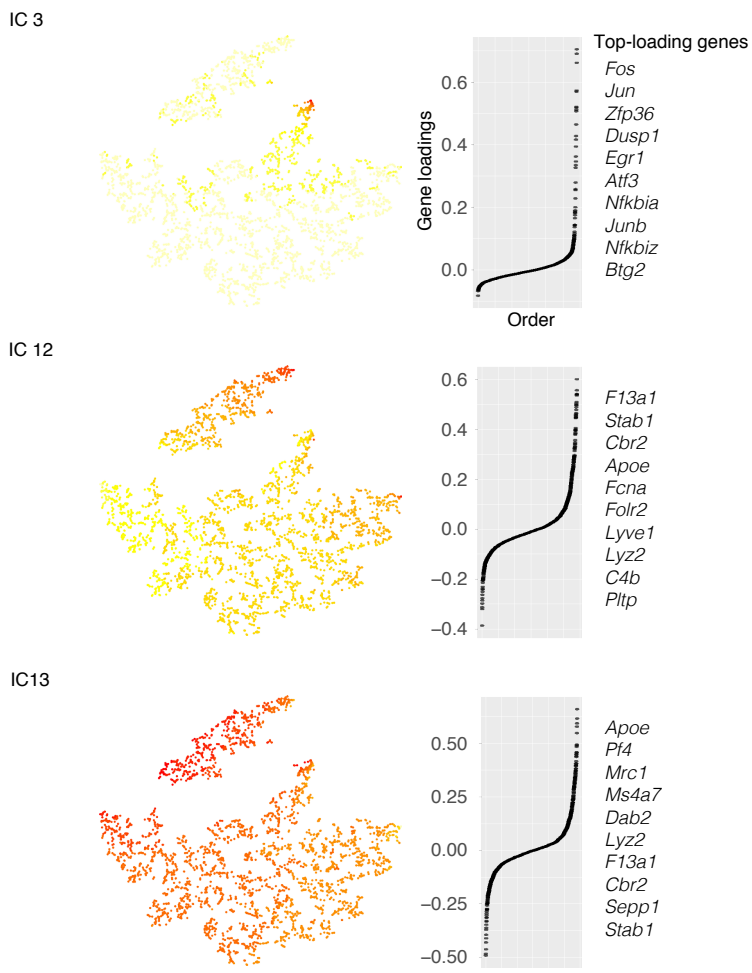

B

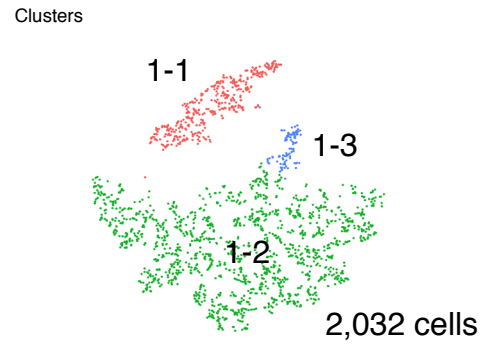

Oligodendrocyte

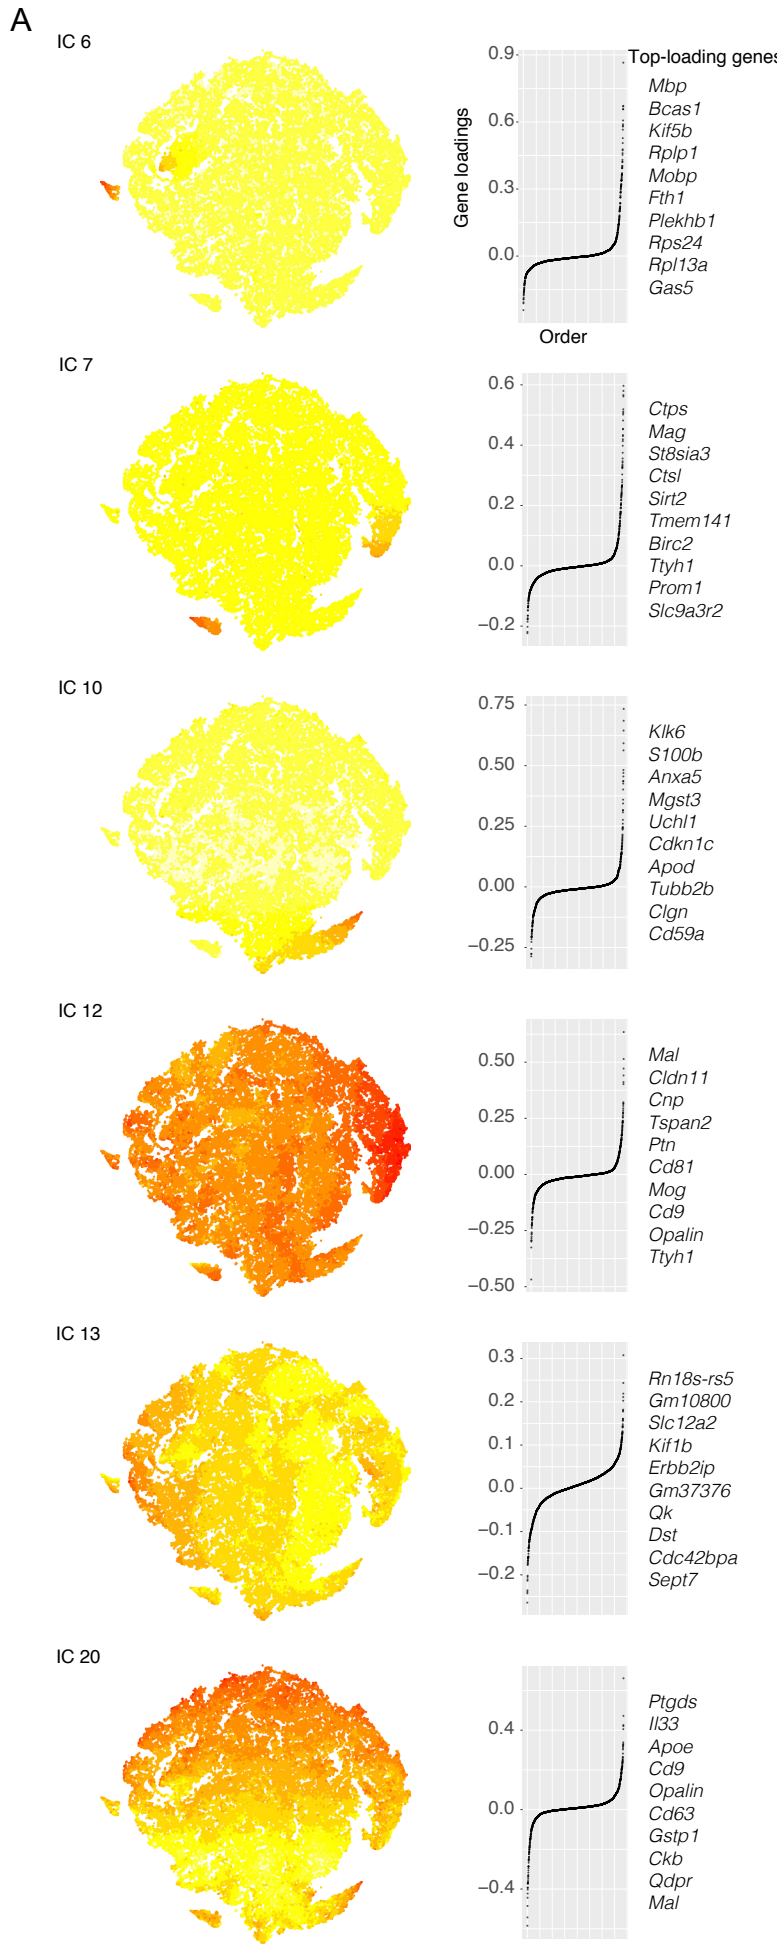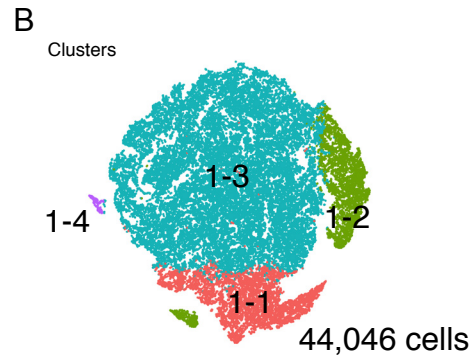

## Polydendrocyte

A

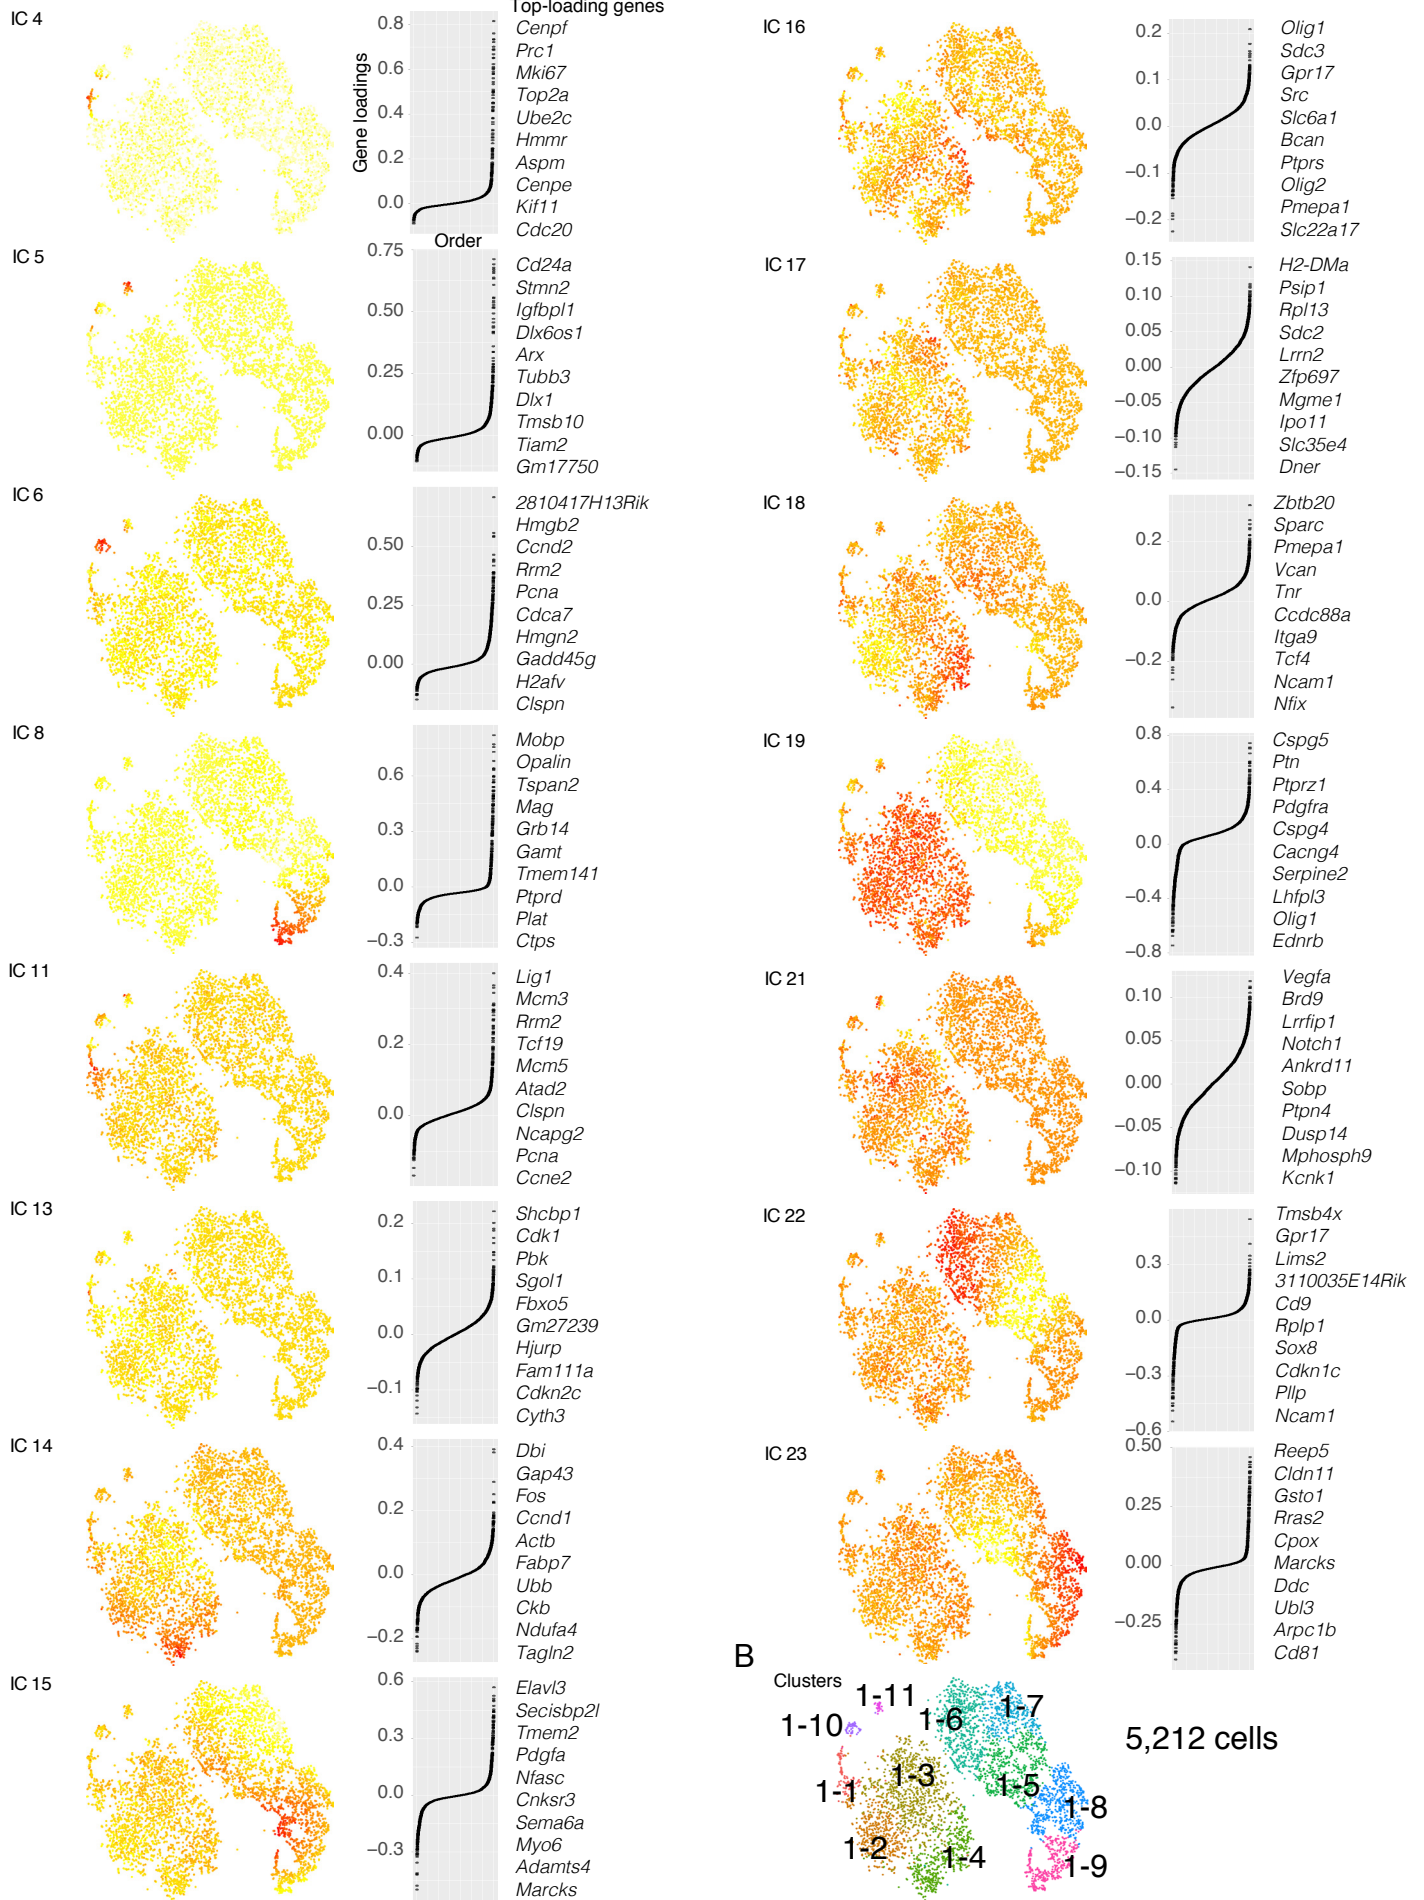

B

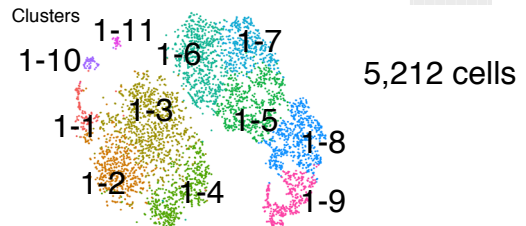

# Data S4E

## Mural

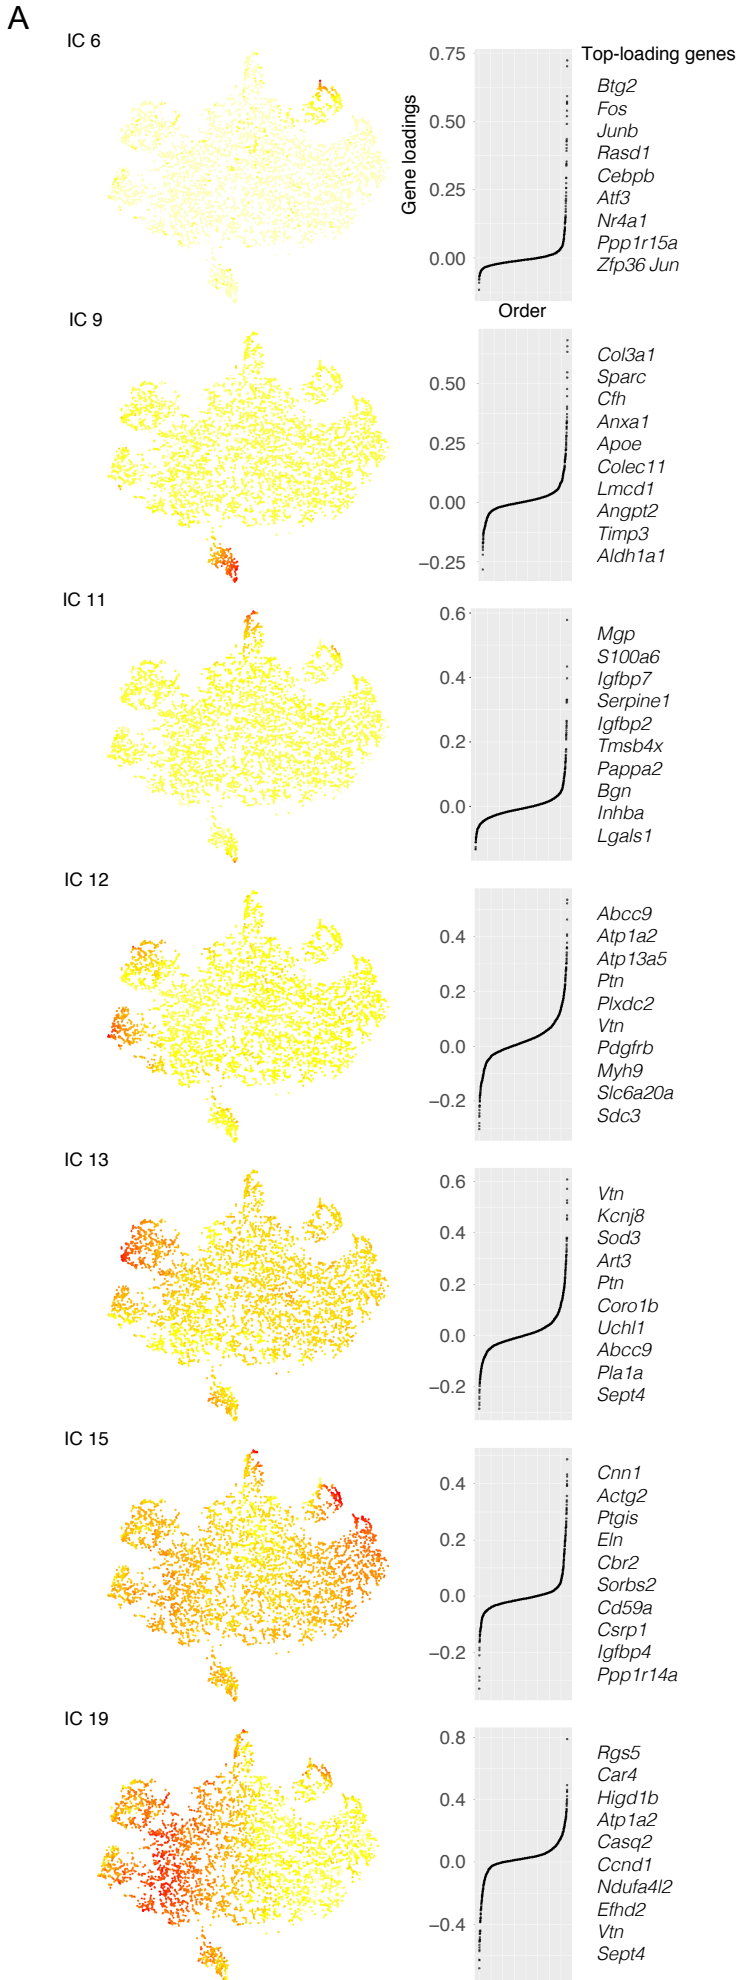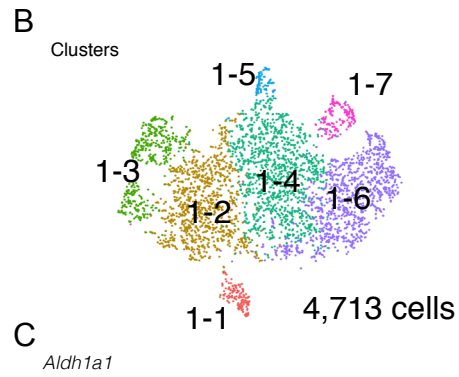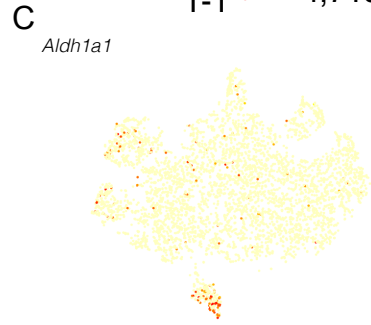

## Fibroblast-Like

A

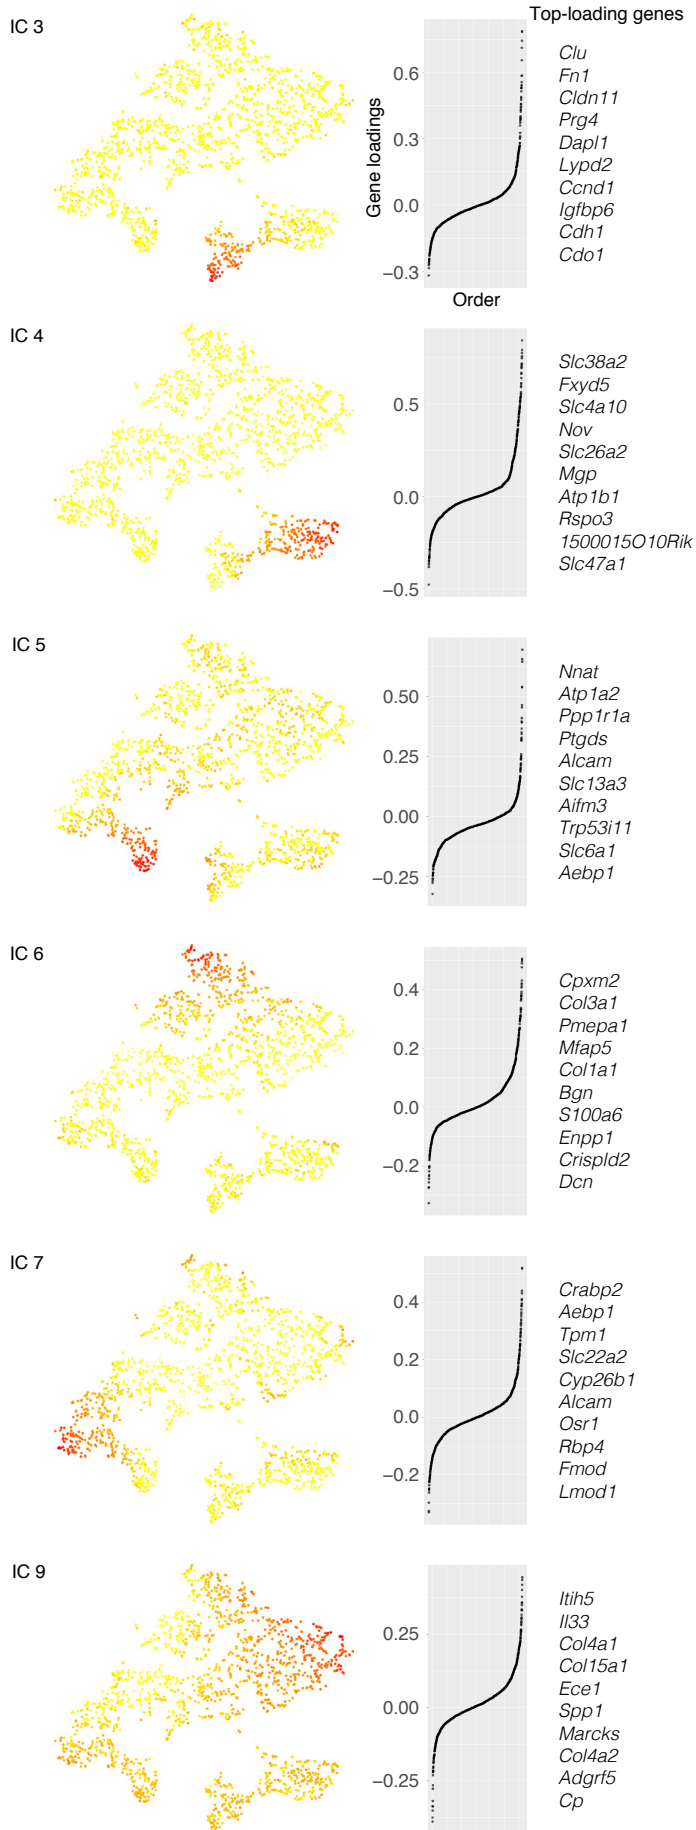

B

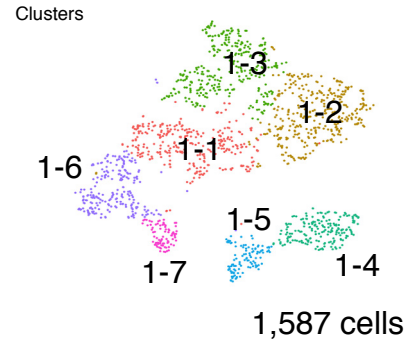

Endothelial

A

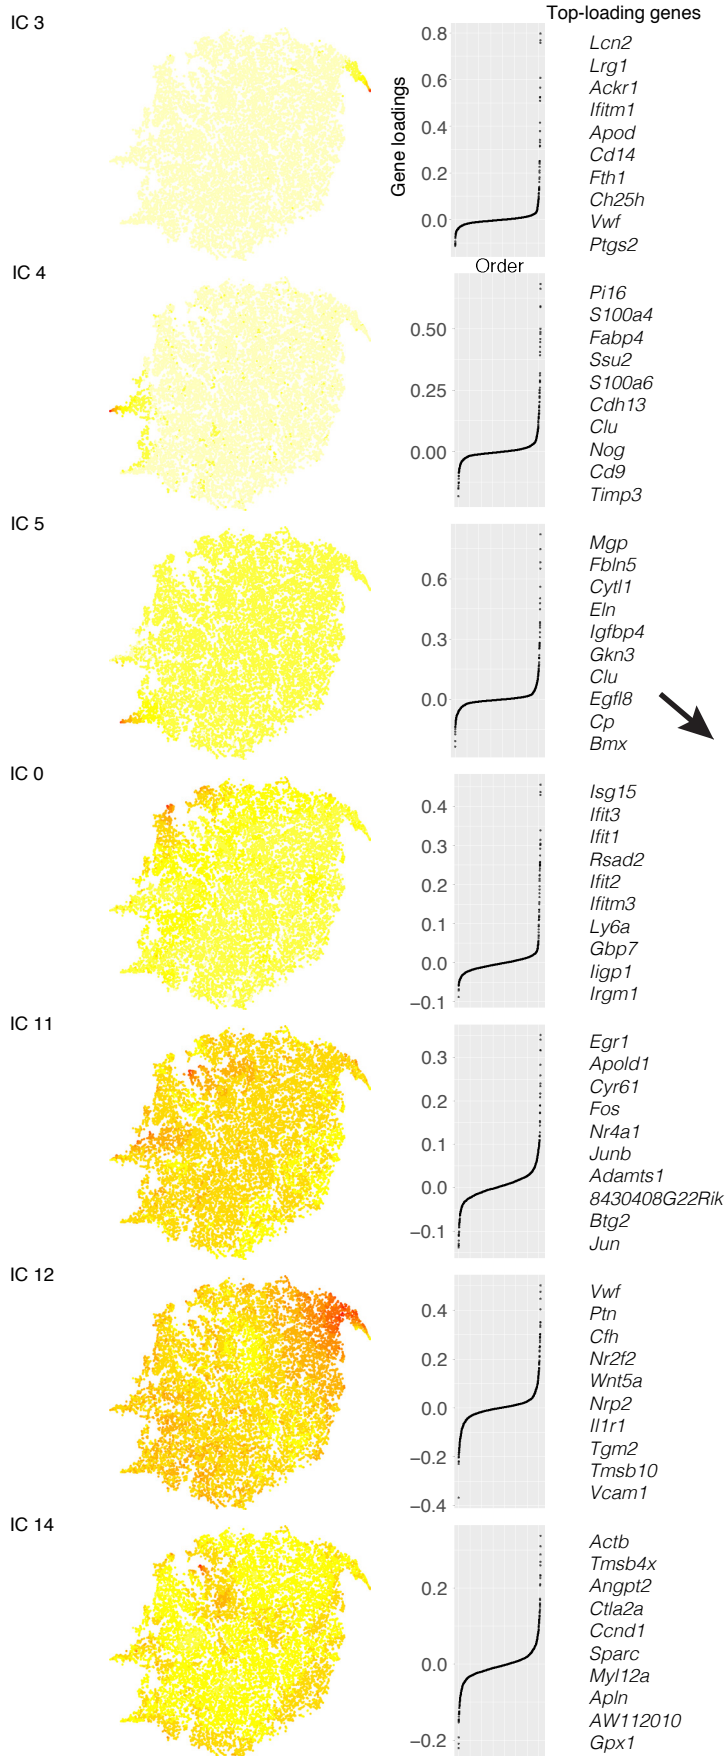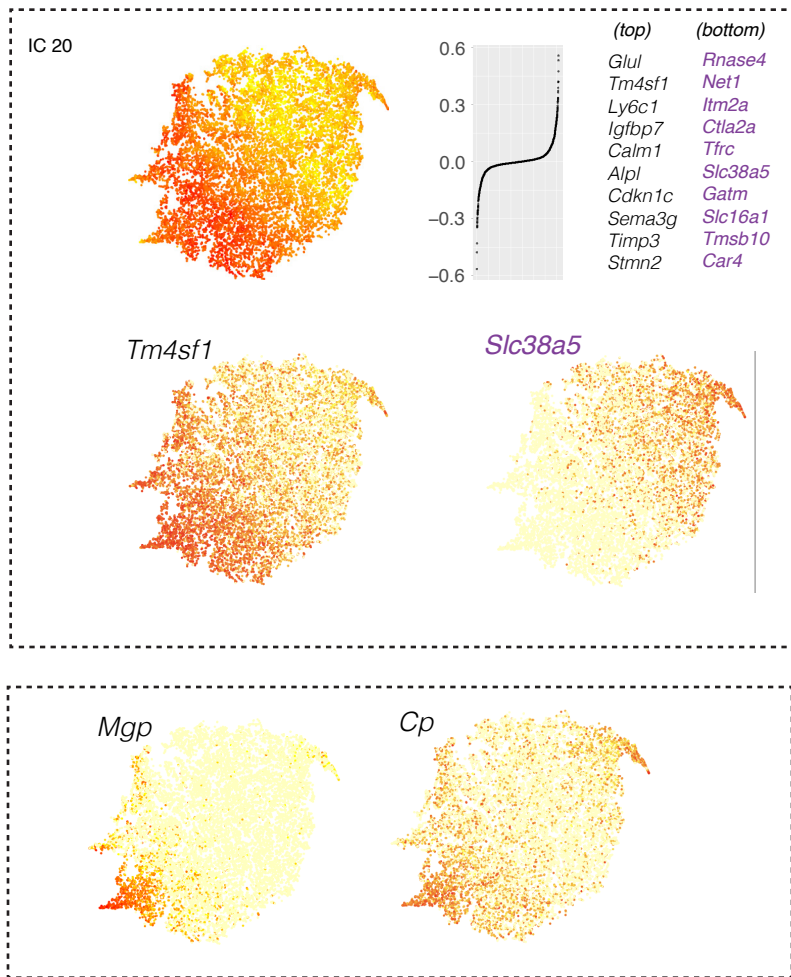

B

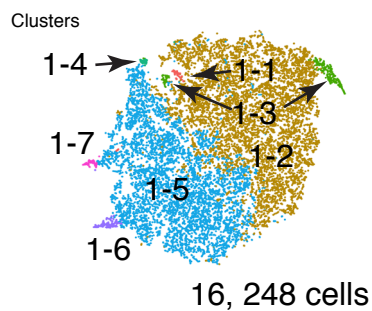

# Data S4H

## Astrocyte

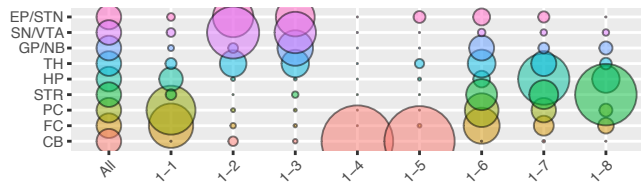

## Oligodendrocyte

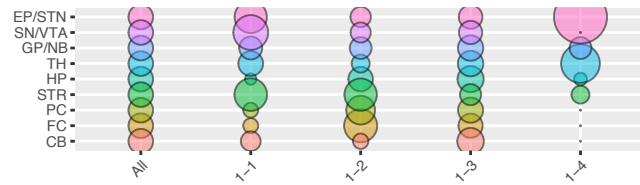

## Microglia / Macrophage

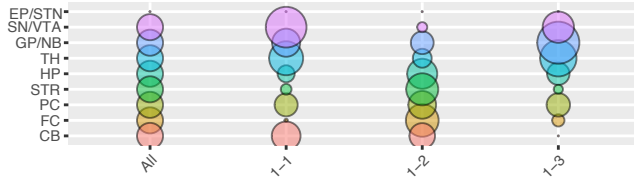

## Polydendrocyte

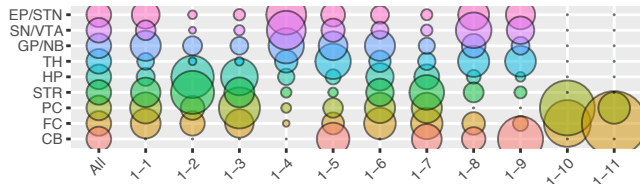

## Mural

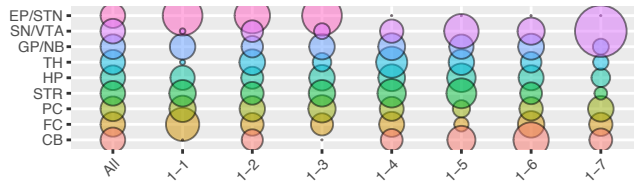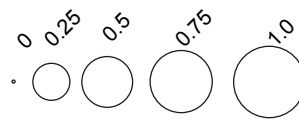

Supplement: NIHMS1503321-supplement-Data_S4.pdf [file NIHMS1503321-supplement-Data_S4.pdf]
