# Supplementary material
Source: PubMed Central journal article supplement (PMC6447408)

### A. Frontal Cortex

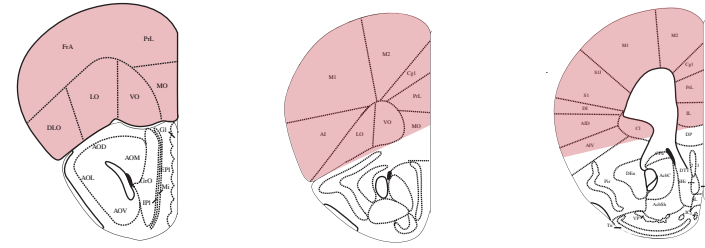

### B. Posterior Cortex

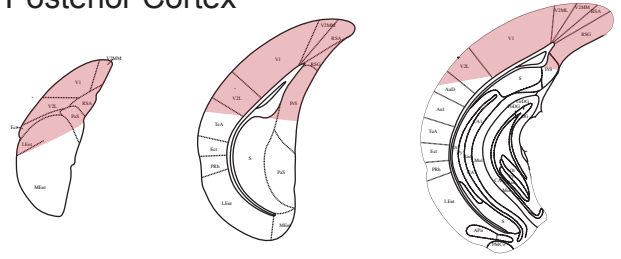

### C. Hippocampus

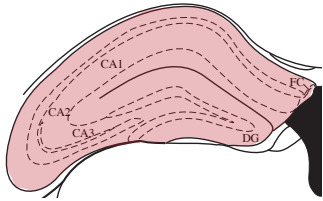

### D. Cerebellum

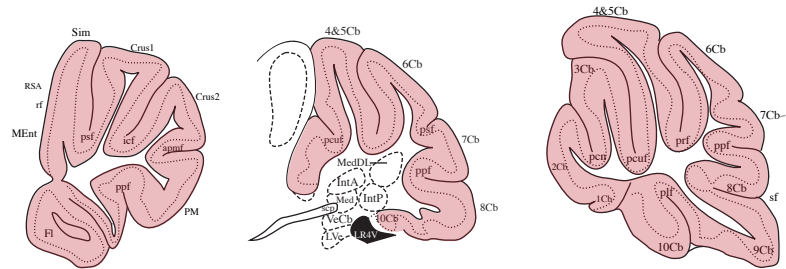

### E. Thalamus

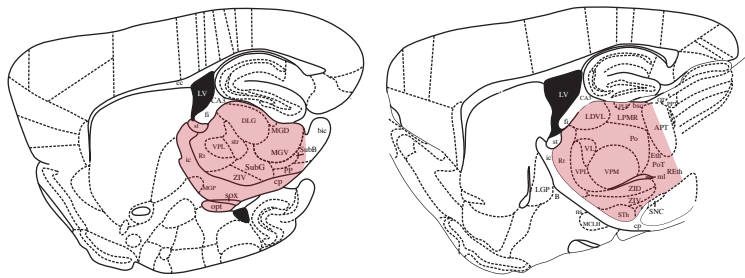

### F. Entopeduncular Nucleus

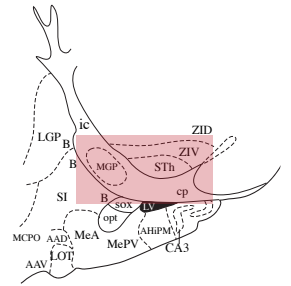

### G. Striatum

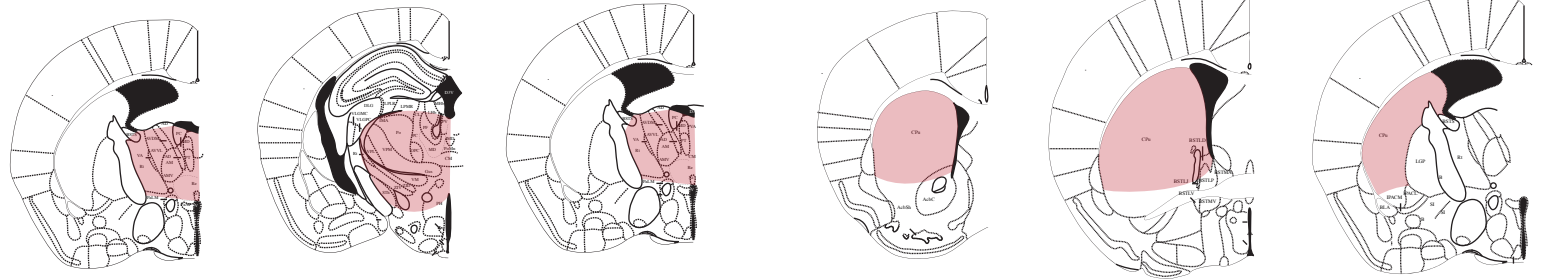

### H. Globus Pallidus Externus / Nucleus Basalis

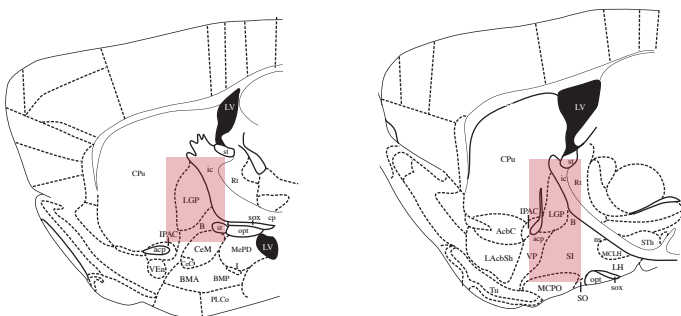

### I. Substantia Nigra / Ventral Tegmental Area

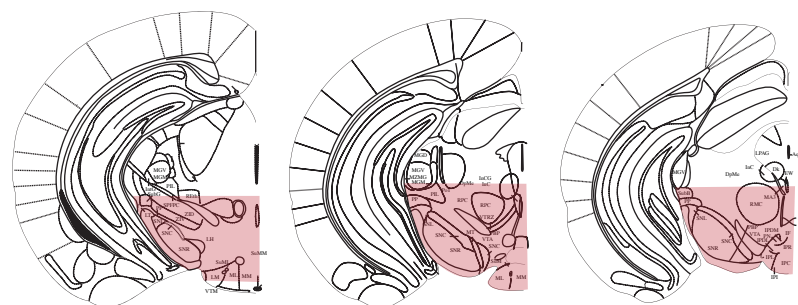

Supplement: NIHMS1503321-supplement-Data_S1.pdf [file NIHMS1503321-supplement-Data_S1.pdf]
