# Supplementary material
Source: PubMed Central journal article supplement (PMC6447408)

Data S5

A

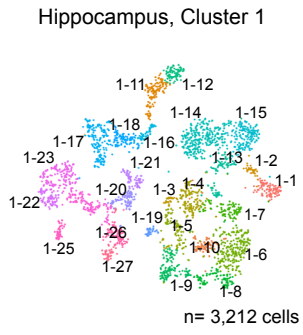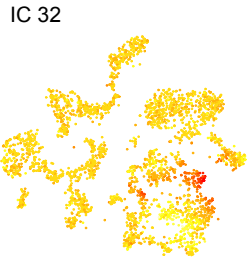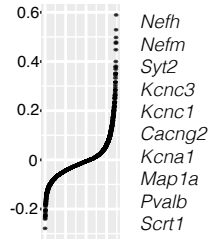

Globus Pallidus externus/  
Nucleus Basalis, Cluster 2

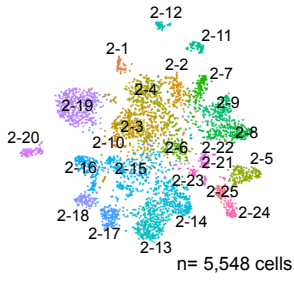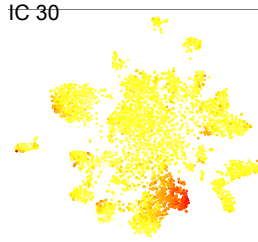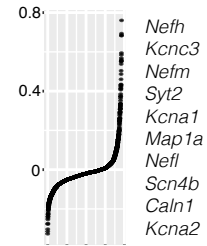

B

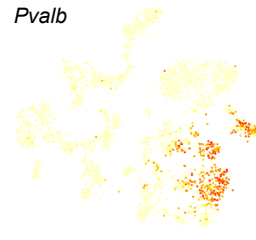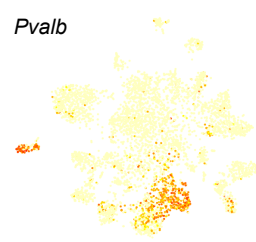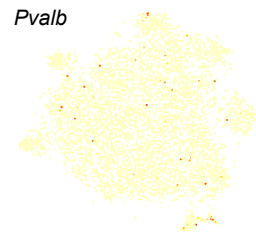

Frontal Cortex, Cluster 3

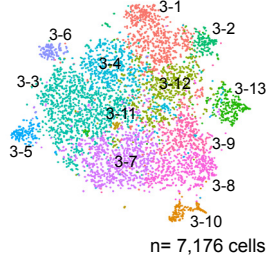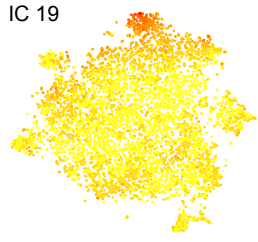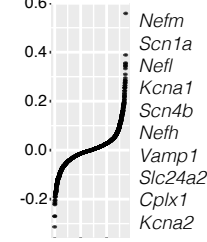

Supplement: NIHMS1503321-supplement-Data_S5.pdf [file NIHMS1503321-supplement-Data_S5.pdf]

# Data S6

## A. Cluster 10 (dSPNs)

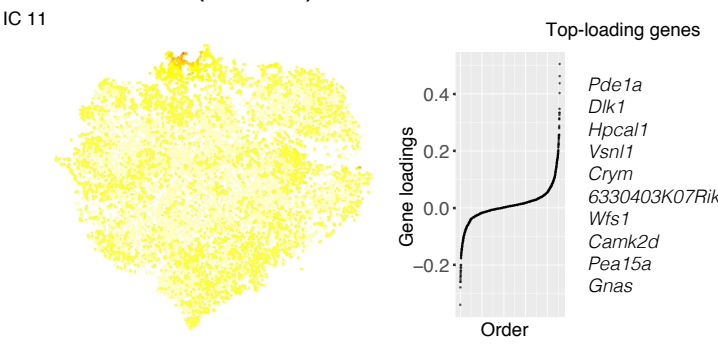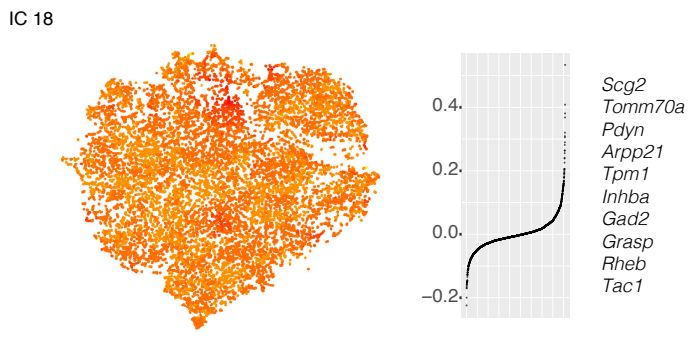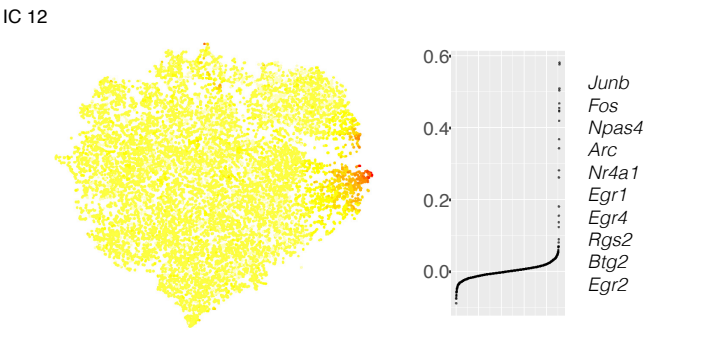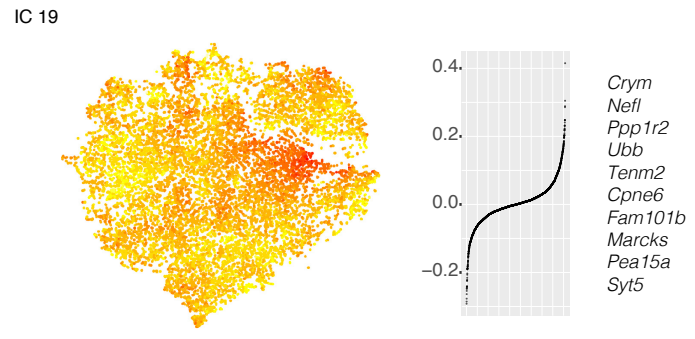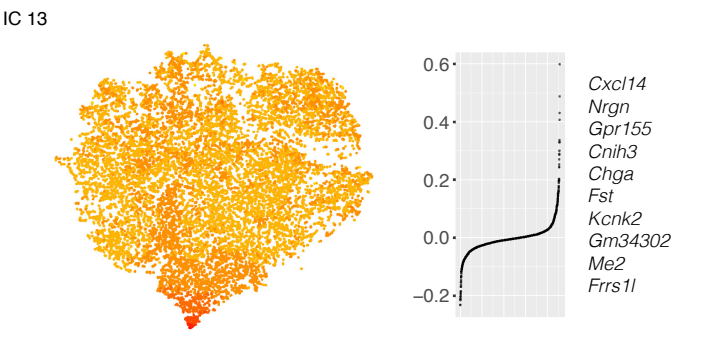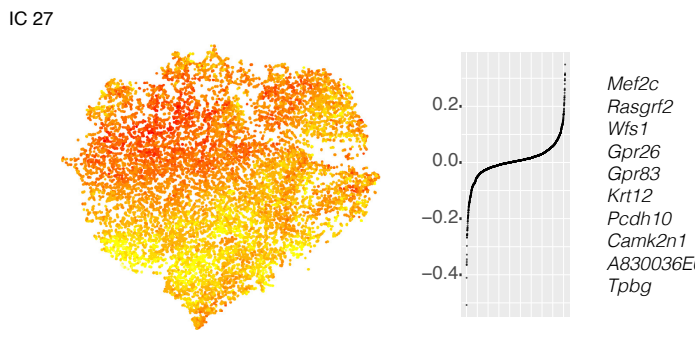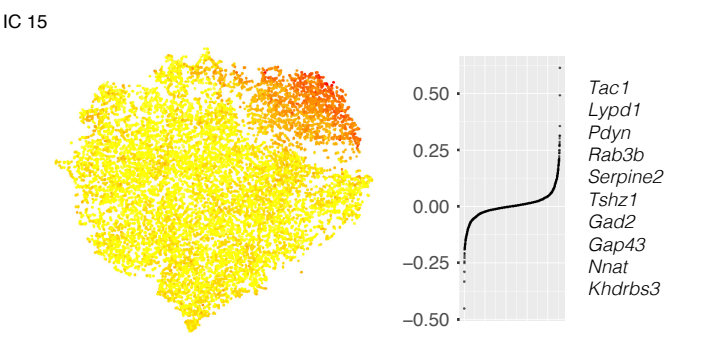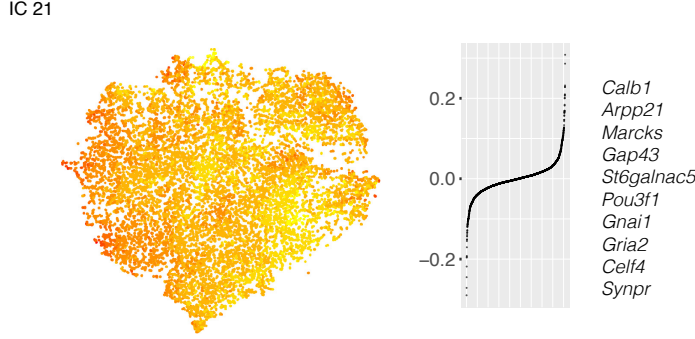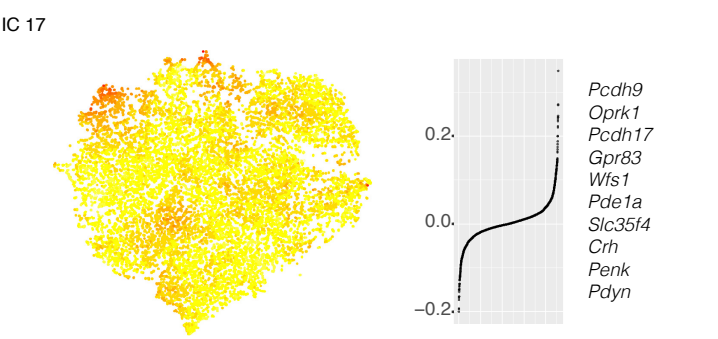

Data S6

B. Cluster 11 (iSPNs)

IC 10

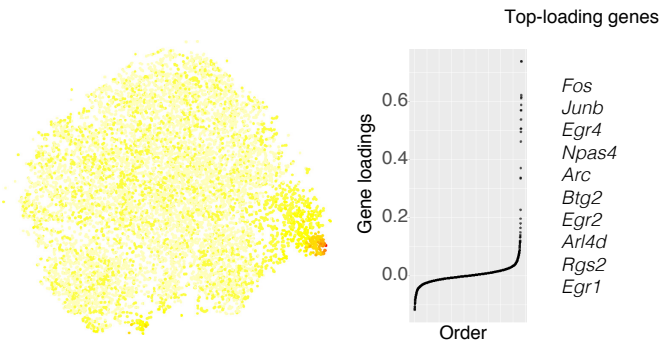

IC 18

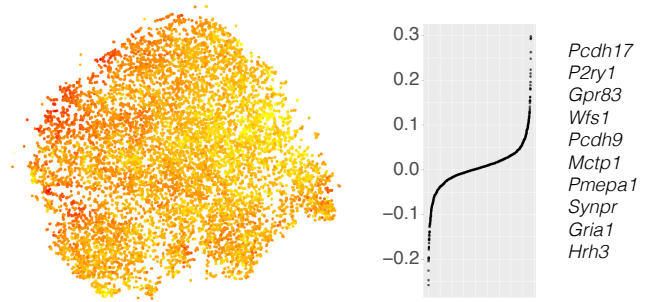

IC 12

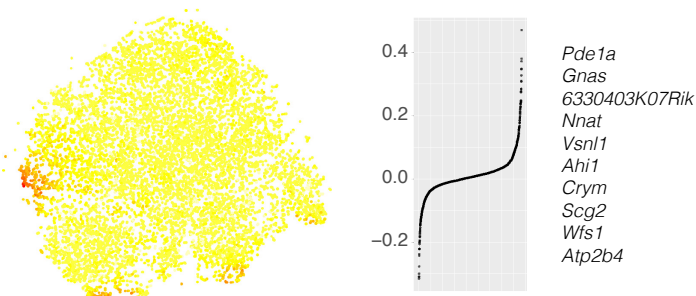

IC 19

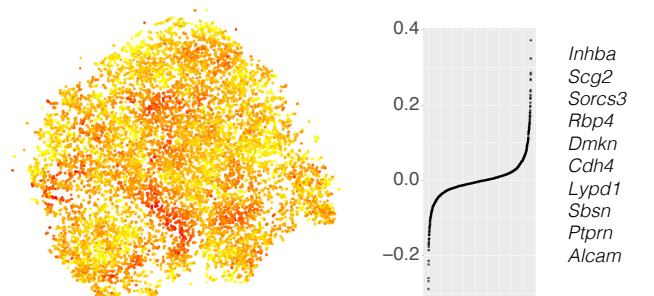

IC 14

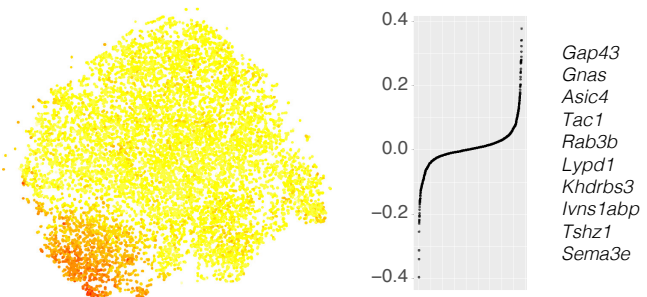

IC 20

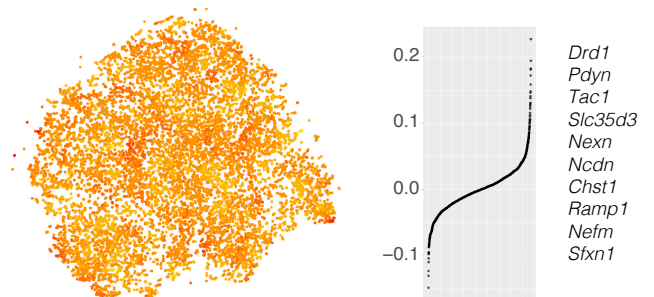

IC 16

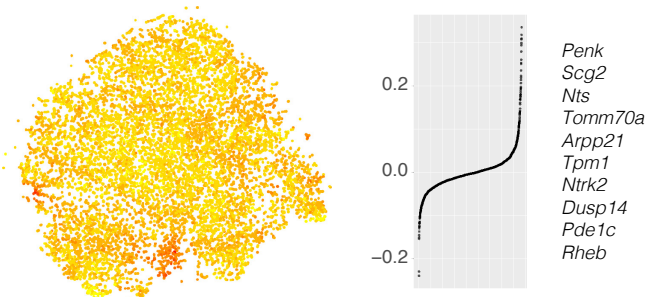

IC 23

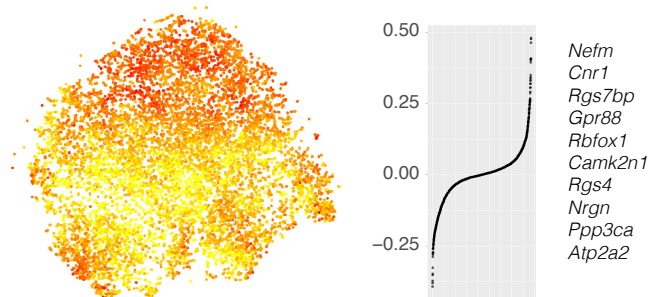

IC 17

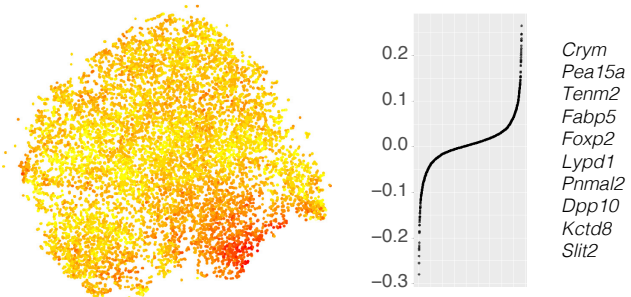

IC 26

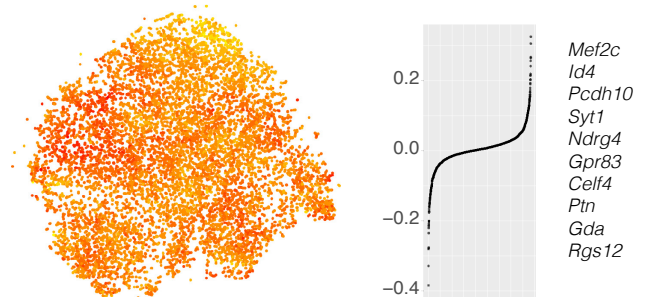

Supplement: NIHMS1503321-supplement-Data_S6.pdf [file NIHMS1503321-supplement-Data_S6.pdf]
